# Supplementary material
Source: PubMed Central journal article supplement (PMC4550306)
Supplement: NIHMS335310-supplement-SUPPL_TABLE_2.pdf [file NIHMS335310-supplement-SUPPL_TABLE_2.pdf]

Phenotypic information of the North American NIDDK IBD Genetics Consortium (IBDGC) cohort

| <b>Characteristics</b>                                        | <b>Numbers</b> |
|---------------------------------------------------------------|----------------|
| <b>Patient Demographics</b>                                   |                |
| Mean age at diagnosis, yr (SD)                                | 26.6 (13.3)    |
| Female, %                                                     | 51.5           |
| Diagnosis, %                                                  |                |
| Crohn's disease                                               | 61.5           |
| Ulcerative colitis                                            | 36.0           |
| Indeterminate colitis                                         | 2.5            |
| Family history of Inflammatory Bowel Disease <sup>a</sup> , % | 28.6           |
| <b>Disease involvement (Crohn's Disease), %</b>               |                |
| Upper gastrointestinal                                        | 16.1           |
| Esophagogastrroduodenal                                       | 8.5            |
| Jejunum                                                       | 9.4            |
| Ileum                                                         | 80.0           |
| Colorectal                                                    | 65.6           |
| Perianal disease                                              | 28.7           |
| <b>Disease pattern (Crohn's Disease), %</b>                   |                |
| Inflammatory                                                  | 48.0           |
| Stricturing                                                   | 21.4           |
| Penetrating                                                   | 30.6           |
| <b>Disease extent (Ulcerative colitis), %</b>                 |                |
| Proctitis                                                     | 5.9            |
| Left-sided colitis                                            | 31.4           |
| Extensive colitis                                             | 62.7           |

<sup>a</sup> Family history of IBD refers to a subject who has a first- or second-degree relative with inflammatory bowel disease.
