# Supplementary material
Source: PubMed Central journal article supplement (PMC4550306)
Supplement: NIHMS335310-supplement-SUPPL_TABLE_S1.pdf [file NIHMS335310-supplement-SUPPL_TABLE_S1.pdf]

**Supplemental Table 1: Description of cohorts**

| <b>Cohorts</b>             | <b>Samples pre-QC</b> | <b>Samples post-QC</b> |           |           |
|----------------------------|-----------------------|------------------------|-----------|-----------|
|                            | <b>IBD</b>            | <b>IBD</b>             | <b>CD</b> | <b>UC</b> |
| <b>Screening Cohorts</b>   |                       |                        |           |           |
| Quebec/Italian (trios)*    | 249                   | 667                    | 176       | 24        |
| Italian (cases:controls)   | 816:421               | 805:412                | 151:421   | 643:421   |
| <i>Total cases:</i>        | 1065                  | 1020                   | 327       | 667       |
| <b>Replication Cohorts</b> |                       |                        |           |           |
| NIDDK (trios)              | 401                   | 395                    | 265       | 130       |
| NIDDK (cases)              | 353:344               | 350                    | 175       | 175       |
| <i>Total cases:</i>        | 754                   | 745                    | 440       | 305       |
| <i>Total:</i>              |                       | 1765                   | 767       | 972       |

\* Includes indeterminate colitis.
